# Supplementary material for: Synthesis of nonepitaxial multilayer silicene assisted by ion implantation
Source: Royal Society of Chemistry journal article supplement (doi:10.1039/c6nr02274j), 2016-01-01
Supplement: c6nr02274j1.pdf [file c6nr02274j1.pdf]

## Supplementary Information

### Synthesis of Nonepitaxial Multilayer Silicene Assisted by Ion Implantation

Hsu-Sheng Tsai,<sup>a\*</sup> Ching-Hung Hsiao,<sup>b</sup> Chia-Wei Chen,<sup>b</sup> Hao Ouyang,<sup>b</sup> Jenq-Horng Liang<sup>ac\*</sup>

<sup>a</sup>Institute of Nuclear Engineering and Science, National Tsing Hua University, Hsinchu 30013, Taiwan, R.O.C.

<sup>b</sup>Department of Material Science and Engineering, National Tsing Hua University, Hsinchu 30013, Taiwan, R.O.C.

<sup>c</sup>Department of Engineering and System Science, National Tsing Hua University, Hsinchu 30013, Taiwan, R.O.C.

**Calculations:** The diffraction patterns in Fig. 3b could be used to derive the interplanar distances. In Fig. S2a, the length of the dashed line, which contains a double reciprocal vector, is equal to  $9.86 \text{ nm}^{-1}$ , so that the length of the reciprocal vector is  $4.93 \text{ nm}^{-1}$ . The inverse of  $4.93 \text{ nm}^{-1}$  is equal to  $0.2028 \text{ nm}$  that corresponds to the (222) interplanar distance ( $0.2027 \text{ nm}$ ) of  $\text{B}_4\text{C}$ . The length ( $17.48 \text{ nm}^{-1}$ ) of the dashed line as shown in Fig. S2b contains a quadruple reciprocal vector. Hence, the length of the reciprocal vector is  $4.37 \text{ nm}^{-1}$ . The inverse of  $4.37 \text{ nm}^{-1}$  is equal to  $0.2288 \text{ nm}$  that corresponds to the (002) interplanar distance ( $0.2264 \text{ nm}$ ) of  $\text{B}_4\text{C}$ .

Similarly, the length of the dashed line in Fig. S3a, which is equal to  $10.5 \text{ nm}^{-1}$ , contains a quadruple reciprocal vector, so that the length of the reciprocal vector is  $2.625 \text{ nm}^{-1}$ . The inverse of  $2.625 \text{ nm}^{-1}$  is equal to  $0.3809 \text{ nm}$  that corresponds to the ( $\frac{1}{2}\frac{1}{2}$ -10) interplanar distance ( $0.381 \text{ nm}$ ) of multilayer silicene. The length ( $11.13 \text{ nm}^{-1}$ ) of the dashed line as shown in Fig. S3b contains a double reciprocal vector. Hence, the length of the reciprocal vector is  $5.565 \text{ nm}^{-1}$ . The inverse of  $5.565 \text{ nm}^{-1}$  is equal to  $0.1796 \text{ nm}$  that corresponds to the (11-21) interplanar distance ( $0.182 \text{ nm}$ ) of multilayer silicene. These calculations, which derived from the experimental results, are in agreement with the theory and the error rate is less than 5%, indicating that the results are believable.

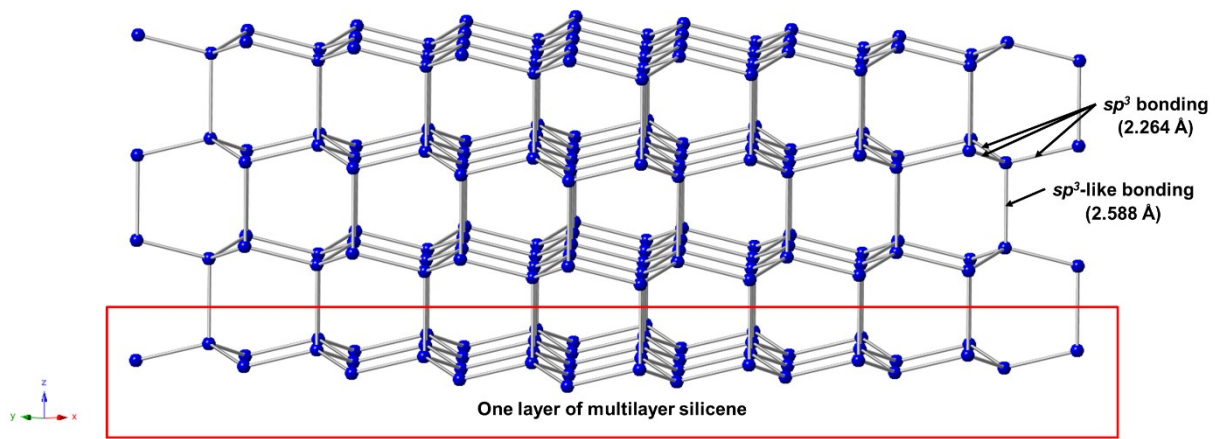

**Fig. S1** The lonsdaleite Si crystal structure with  $sp^3$ - $sp^3$ -like mixed orbital hybridization.

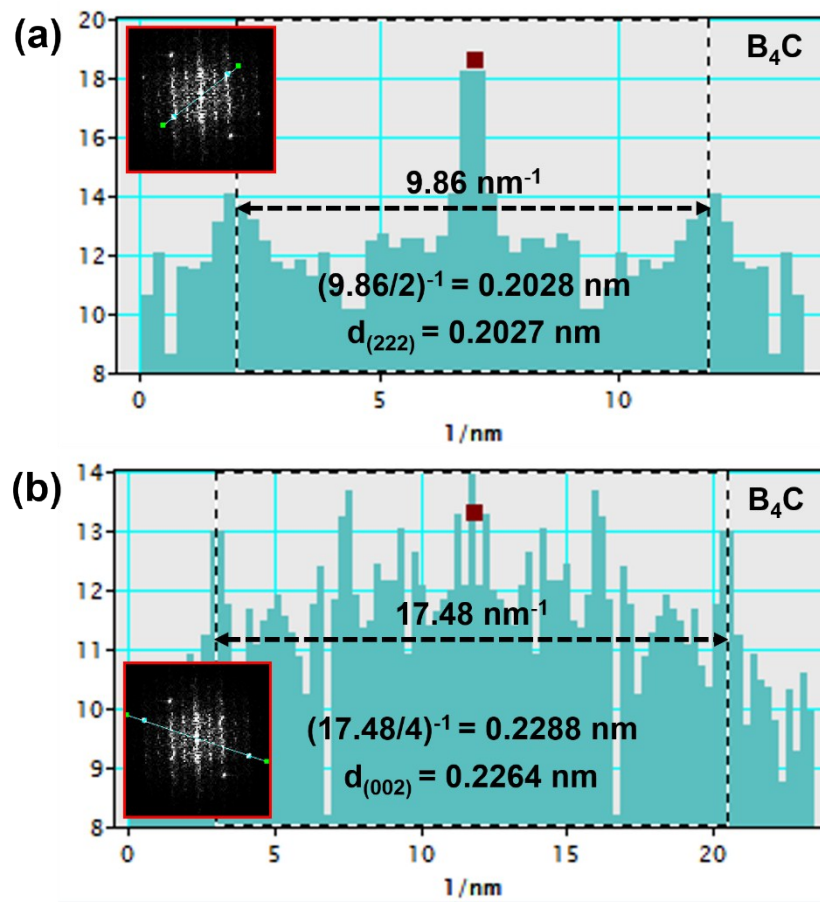

**Fig. S2** (a) The distance between (222) reciprocal points of  $B_4C$ . (b) The distance between (002) reciprocal points of  $B_4C$ .

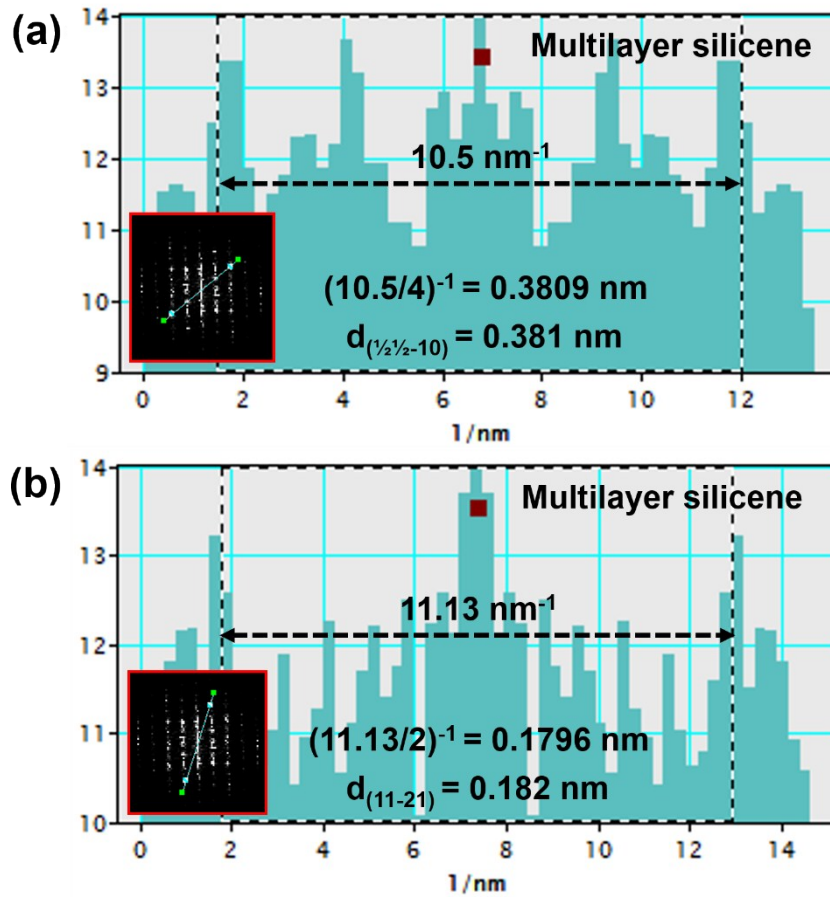

**Fig. S3** (a) The distance between  $(\frac{1}{2}\frac{1}{2}-10)$  reciprocal points of multilayer silicene. (b) The distance between  $(11-21)$  reciprocal points of multilayer silicene.
